# Supplementary material for: Glycaemia Fluctuations Improvement in Old-Age Prediabetic Subjects Consuming a Quinoa-Based Diet: A Pilot Study
Source: MDPI journal article supplement (doi:10.3390/nu14112331), 2022-06-01

## Supplementary

Table S1. Comparison of nutritional values of products marketed in a regular diet with similar ingredients than products based on quinoa for the study.

|                | Energy |        | Proteins |       | Fats  |       | Carbohydrates |       |
|----------------|--------|--------|----------|-------|-------|-------|---------------|-------|
|                | RD     | QD     | RD       | QD    | RD    | QD    | RD            | QD    |
| Cookie         | 456    | 366,43 | 6,14     | 9,11  | 21,05 | 16,15 | 63,1          | 49,5  |
| Cracker        | 400    | 352,83 | 10       | 9,75  | 10    | 16,9  | 65            | 35,54 |
| Brioche        | 205    | 278,69 | 7,69     | 9,72  | 2,56  | 7,87  | 38,46         | 39,23 |
| Sponge cake    | 388    | 300,14 | 6,25     | 11,49 | 16,25 | 18,18 | 53,75         | 24,55 |
| Sliced bread   | 344    | 202,87 | 6,25     | 6,86  | 12,5  | 7,66  | 50            | 24,94 |
| Baguette bread | 263    | 210,35 | 7,02     | 6,95  | 1,75  | 4,96  | 50,88         | 29,63 |
| Pasta          | 357,14 | 323,45 | 12,5     | 12,12 | 1,79  | 12,3  | 75            | 35,68 |

gr/100gr of product

The nutritional information of the products in RD was made choosing equivalent marketed products in ingredients used with the difference of the origin of the flour

Table S2. Baseline characteristics of 9 patients participating in the study.

| Patient | Sex        | Age           | IFG          | Weight        | BMI           | HbA1c        | SBP             | DBP            | Waist<br>/hip  | HR            | Fam.<br>hist.<br>DM | CV         | HLD        | HTA        | Smoker       | Alcohol         |
|---------|------------|---------------|--------------|---------------|---------------|--------------|-----------------|----------------|----------------|---------------|---------------------|------------|------------|------------|--------------|-----------------|
| num     | M/<br>F    | Years         | Years        | Kg            | Kg /<br>m2    | %            | mmHg            | mmHg           | Ratio          | bpm           | Y /<br>N            | Y /<br>N   | Y /<br>N   | Y /<br>N   | Y / N /<br>E | M / D /<br>N    |
| 1       | M          | 69            | 2            | 77            | 26            | 5.8          | 144             | 90             | 0.92           | 63            | N                   | N          | Y          | Y          | Y            | M               |
| 2       | F          | 73            | 3            | 72            | 34            | 5.9          | 159             | 85             | 0.82           | 70            | Y                   | N          | N          | N          | N            | M               |
| 3       | F          | 67            | Na           | 75            | 31            | 5.9          | 126             | 85             | 0.95           | 83            | N                   | Y          | Y          | Y          | Y            | M               |
| 4       | F          | 66            | 2            | 64            | 25            | 6.1          | 135             | 95             | 0.79           | 66            | Y                   | N          | Y          | Y          | N            | D               |
| 5       | M          | 69            | 3            | 90            | 31            | 6.7          | 125             | 75             | 0.93           | 48            | N                   | N          | N          | N          | N            | M               |
| 6       | F          | 74            | 3            | 69            | 27            | 6.2          | 107             | 65             | 0.87           | 67            | N                   | N          | N          | Y          | N            | M               |
| 7       | F          | 67            | 3            | 82            | 30            | 6.5          | 130             | 85             | 0.83           | 67            | N                   | N          | N          | Y          | N            | N               |
| 8       | M          | 72            | 0            | 76            | 27            | 5.7          | 129             | 58             | 0.92           | 59            | N                   | N          | N          | N          | Y            | M               |
| 9       | F          | 69            | 2            | 61            | 25            | 6.3          | 120             | 80             | 0.89           | 66            | Y                   | N          | Y          | Y          | N            | D               |
| n = 9   | 3M<br>/ 6F | 69.6<br>(2.8) | 2.3<br>(1.0) | 74.0<br>(8.7) | 28.4<br>(3.2) | 6.1<br>(0.3) | 130.4<br>(14.6) | 79.6<br>(11.9) | 0.88<br>(0.06) | 65.3<br>(9.3) | 3Y<br>/ 6N          | 1Y<br>/ 8N | 4Y /<br>5N | 6Y /<br>3N | 3Y /<br>6N   | 6M /<br>2D / 1N |

Num, number; M / F, male / female; bpm, beats per minute; Y / N, yes / no; Y / N / E, yes / no / ex-smoker; M / D / N, monthly / daily / no; IFG, time on impaired fasting glucose; BMI, body mass index; SBP, systolic blood pressure; DBP, diastolic blood pressure; HR, heart rate; fam, family; hist, history; DM; diabetes mellitus; CV, cardiovascular disease; HLD, hyperlipidemia; HTA, hypertension; Alcohol, alcohol consumption; na, not available.

Age, IFG, weight, BMI, HbA1c, SBP, DBP, waist/hip and HR are expressed as mean (standard deviation).

Table S3. Dietary intake differences between regular and quinoa diet.

| Variables                | Regular diet         | Quinoa diet             | <i>Pvalue</i> |
|--------------------------|----------------------|-------------------------|---------------|
|                          | Median (Q1, Q3)      | Median (Q1, Q3)         |               |
| Carbohidrats, g          | 32.1 (29.6, 37.8)    | 28.3 (22.8, 29.4)       | 0.004         |
| Vegetable fiber, g       | 5.3 (4.9, 6.1)       | 4.5 (3.8, 4.8)          | 0.039         |
| Lipids, g                | 15.3 (14.4, 16.1)    | 19.9 (18.8, 20.8)       | 0.004         |
| SFAs, g                  | 4 (3.9, 5.3)         | 5.1 (4.4, 5.8)          | 0.012         |
| MUFAs, g                 | 6.8 (6.3, 7.5)       | 9.4 (8.7, 9.6)          | 0.027         |
| Sodium, mg               | 386.3 (352.9, 554.6) | 335.1 (299.1, 389.8)    | 0.020         |
| Vitamin B2, µg           | 0.32 (0.31, 0.35)    | 0.4 (0.39, 0.41)        | 0.008         |
| Starch, g                | 18.6 (15.4, 20.5)    | 6.3 (5.6, 8.9)          | 0.004         |
| Myristic acid (C14:0), g | 0.34 (0.25, 0.41)    | 0.44 (0.33, 0.52)       | 0.012         |
| Palmitoleic (C16:1), g   | 0.23 (0.22, 0.26)    | 0.28 (0.27, 0.3)        | 0.008         |
| Oleic (C18:1), g         | 6.5 (5.9, 7)         | 8.8 (8.2, 8.9)          | 0.020         |
| Folic acid, µg           | 0.22 (0, 0.43)       | 0 (0, 0)                | 0.043         |
| Vitamin E, mg            | 1.8 (1.5, 2)         | 2.2 (2, 2.3)            | 0.004         |
| Tocopherol total, mg     | 1.3 (1.2, 1.3)       | 1.7 (1.6, 1.8)          | 0.004         |
| α - Tocopherol, mg       | 0.98 (0.88, 1.05)    | 1.27 (1.24, 1.43)       | 0.004         |
| β - Tocopherol, mg       | 0.01 (0.01, 0.01)    | 0.02 (0.01, 0.02)       | 0.004         |
| γ - Tocopherol, mg       | 0.3 (0.2, 0.41)      | 0.55 (0.5, 0.69)        | 0.004         |
| δ - Tocopherol, mg       | 0.03 (0.02, 0.04)    | 0.06 (0.05, 0.07)       | 0.008         |
| Zinc, mg                 | 1.9 (1.7, 2.1)       | 2.2 (2, 2.3)            | 0.039         |
| Magnesium, mg            | 0.62 (0.61, 0.68)    | 0.47 (0.38, 0.49)       | 0.012         |
| Fluoride, µg             | 57.4 (52.4, 65.1)    | 46.3 (43.9, 59.6)       | 0.027         |
| Selenium, µg             | 19.6 (18.7, 21.7)    | 14.1 (12.1, 19.5)       | 0.039         |
| Cystine, mg              | 170.6 (164.2, 179.6) | 146.3 (142.5, 167.5)    | 0.008         |
| Arginine, mg             | 699.7 (688.3, 721.3) | 591.7 (571.9, 666.4)    | 0.008         |
| Glutamic acid, mg        | 2339 (2177.6, 2540)  | 1981.4 (1847.3, 2228.8) | 0.008         |

|                                |                         |                         |       |
|--------------------------------|-------------------------|-------------------------|-------|
| cis-MUFAs, g                   | 5.1 (4.6, 5.7)          | 6.6 (4.8, 7.8)          | 0.027 |
| trans-PUFAs, g                 | 0.01 (0.01, 0.03)       | 0.02 (0.02, 0.04)       | 0.039 |
| Cellulose, g                   | 0.73 (0.68, 0.87)       | 0.63 (0.56, 0.64)       | 0.039 |
| Polysaccharides, g             | 0.65 (0.56, 0.88)       | 0.47 (0.39, 0.51)       | 0.020 |
| Phytic acid, g                 | 0.02 (0.01, 0.04)       | 0 (0, 0.01)             | 0.027 |
| Proline, mg                    | 755.7 (715, 893.8)      | 667.7 (637.8, 734.6)    | 0.039 |
| Glycemic index                 | 47 (44, 48.9)           | 37.3 (35.3, 40.8)       | 0.004 |
| Glycaemic load                 | 15.9 (13.3, 16.8)       | 6.9 (6.2, 9.8)          | 0.004 |
| ORAC                           | 2365.2 (2296.4, 2584.1) | 1881.4 (1582.3, 2513.1) | 0.025 |
| Nitrogen                       | 1.3 (1.1, 13.5)         | 61.8 (52, 97.6)         | 0.004 |
| % of energy from lipids        | 32.1 (30.9, 34)         | 41.3 (36.7, 43.4)       | 0.004 |
| % of energy from carbohydrates | 47.2 (41.9, 49)         | 36.5 (35.4, 40.2)       | 0.004 |

SFAs, saturated fatty acids; MUFAs, Monounsaturated fatty acids; cis-MUFAs, cis-monounsaturated fatty acids; trans-PUFAs, trans-polyunsaturated fatty acids; ORAC, oxygen radical absorbance capacity.

Values are presented in median and quartiles. For each participant, mean value for dietary intake, including all meals, was considered.

Variables correspond to the nutrients with statistically significant differences ( $p \leq 0.05$  using the Wilcoxon signed rank test) between two groups.

Figure S1. Diagram participant flow.

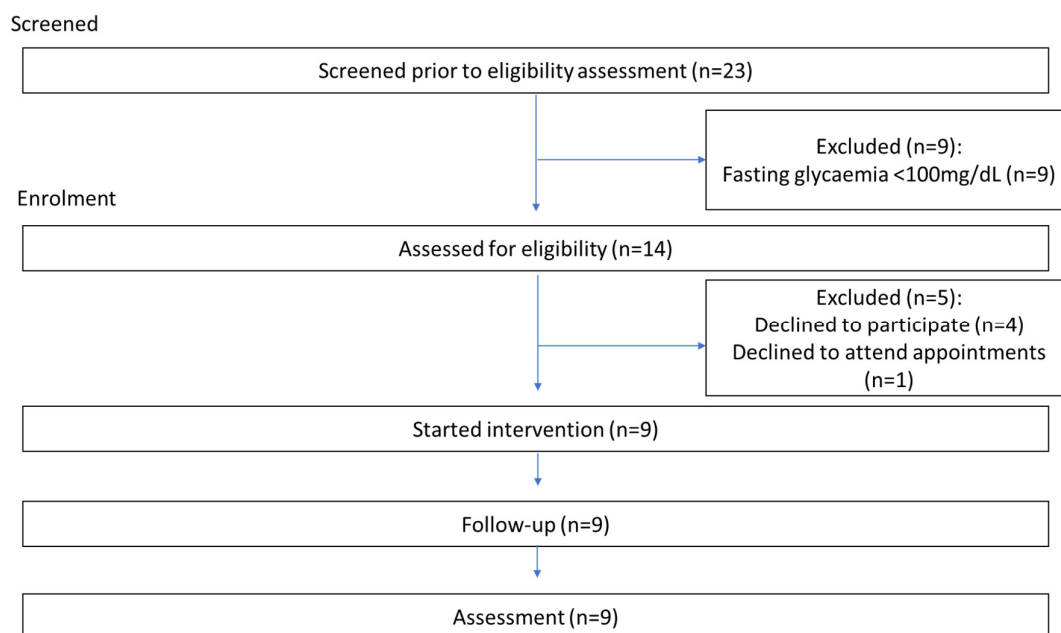

According to Eldridge et al. CONSORT 2010 statement: extension to randomised pilot and feasibility trials. Pilot and Feasibility Studies (2016) 2:64

Figure S2. Glucose concentrations of patients (a) at discrete time points (b) at equal time points with interpolation (c) as aligned curve

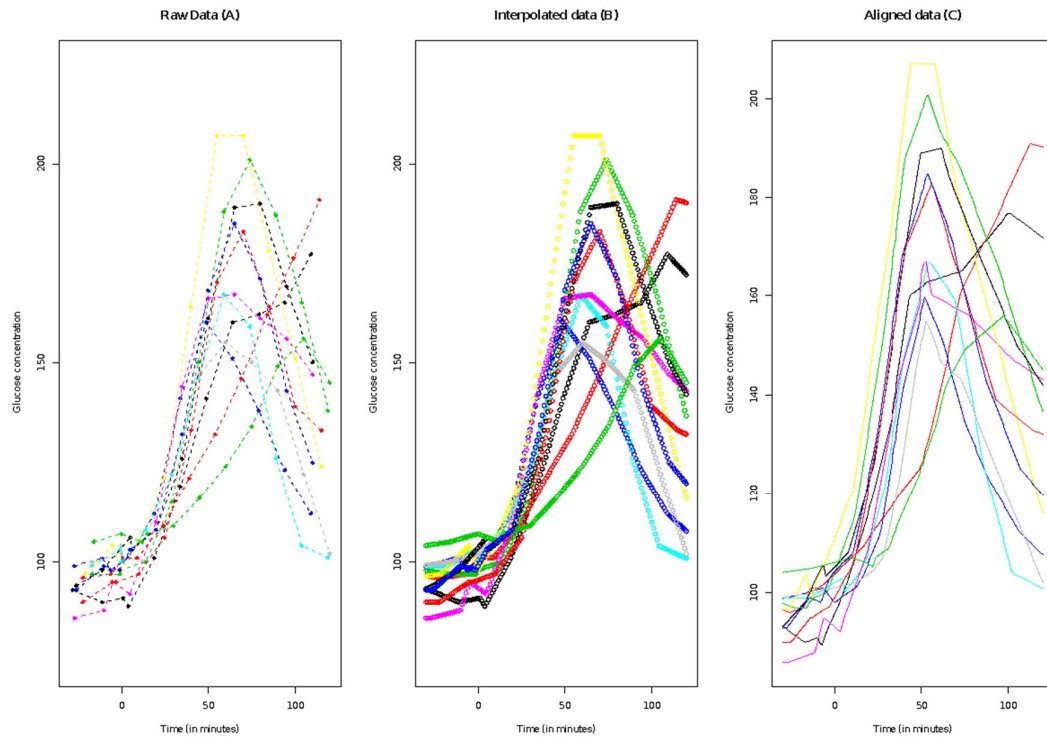

Supplement: s1 [file s1]
